# Supplementary material
Source: Springer Nature journal article supplement (https://www.springermedizin.de/resource/supplementary/12957_2013_1696_MOESM4_ESM.pdf/9563306)

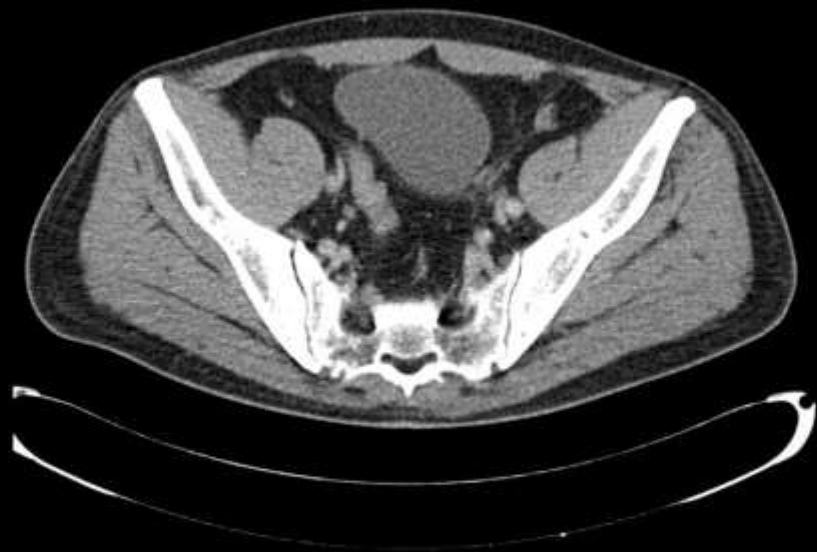

|P|

Supplement: MOESM4 [file 9563306]
